# Supplementary material
Source: PubMed Central journal article supplement (PMC4719425)

Supplementary Figure S2

Altered *Med16* locus in *Med16* KO #1 cells. 22-bp and 76-bp deletions are observed at the gRNA target sites.

**Med KO #1**  
 **$\Delta 22$**   
**(n=6)**

CAGCGAGGCCATCACCTGCCTGGAGTGGGACCAGTCAGGtgaggc  
\*\*\*\*\*-----\*\*\*\*\*  
CAGCGAGG-----CCAGTCAGGtgaggc

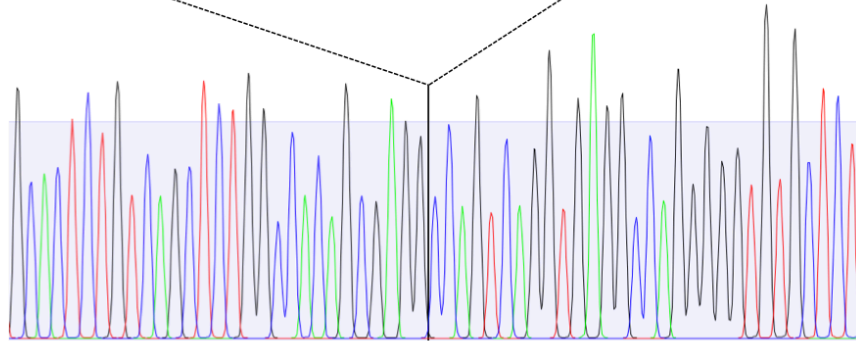

**Med KO #1**  
 **$\Delta 76$**   
**(n=3)**

GAAGTGC.....GAGGCCATCACCTGCCTGGAGTGGGA.....TCTCAGT  
\*\*\*\*\*-----\*\*\*\*\*  
GAAGTGC.....TCTCAGT

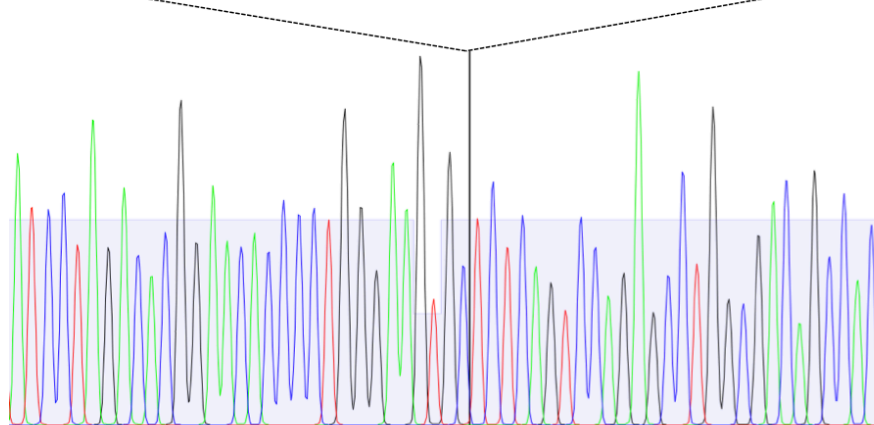

Supplement: MCB.00785-15_zmb999101098so2.pdf [file MCB.00785-15_zmb999101098so2.pdf]
