# Supplementary material
Source: PubMed Central journal article supplement (PMC4719425)

Supplementary Figure S3

Altered *Med16* locus in *Med16* KO #2 cells. 1-bp and 36-bp deletions are observed at the gRNA target sites.

**Med KO #2**  
**Δ1**  
**(n=7)**

CAGCGAGGCCATCACCTGCCTGGAGTGGGACCAGTCAGGtgaggc  
\*\*\*\*\*\_\*\*\*\*\*  
CAGCGAGGCCATCACCTGCCT-GAGTGGGACCAGTCAGGtgaggc

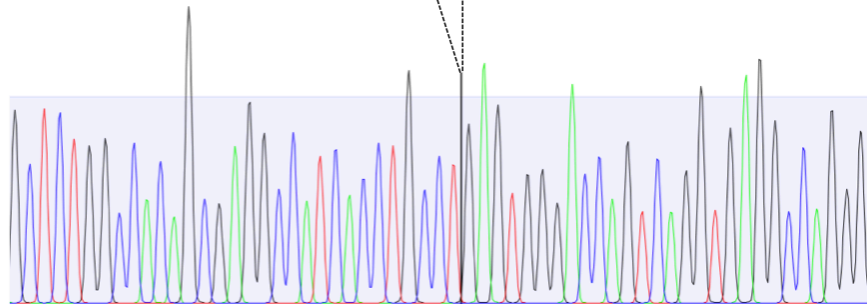

**Med KO #2**  
**Δ36**  
**(n=3)**

CAGCGAGGCCATCACCTGCCTGGAGTGGGACCAGTCAGGtgaggc  
\*\*\*-----\*\*\*  
CAGC-----gaggc

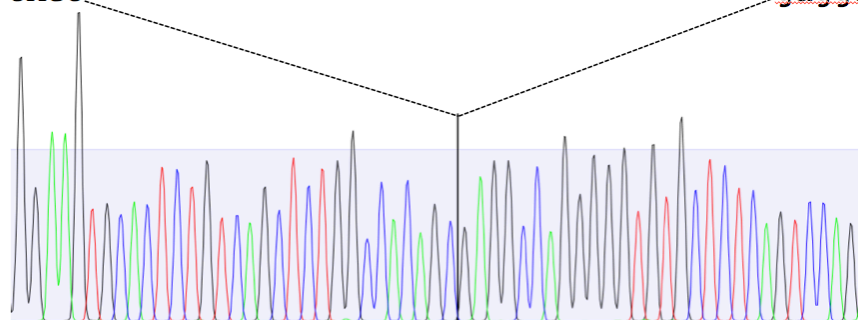

Supplement: MCB.00785-15_zmb999101098so3.pdf [file MCB.00785-15_zmb999101098so3.pdf]
