# Supplementary material
Source: PubMed Central journal article supplement (PMC4719425)

## Supplementary Figure S1

Domain prediction of MED16 using SMART (<http://smart.embl-heidelberg.de>).

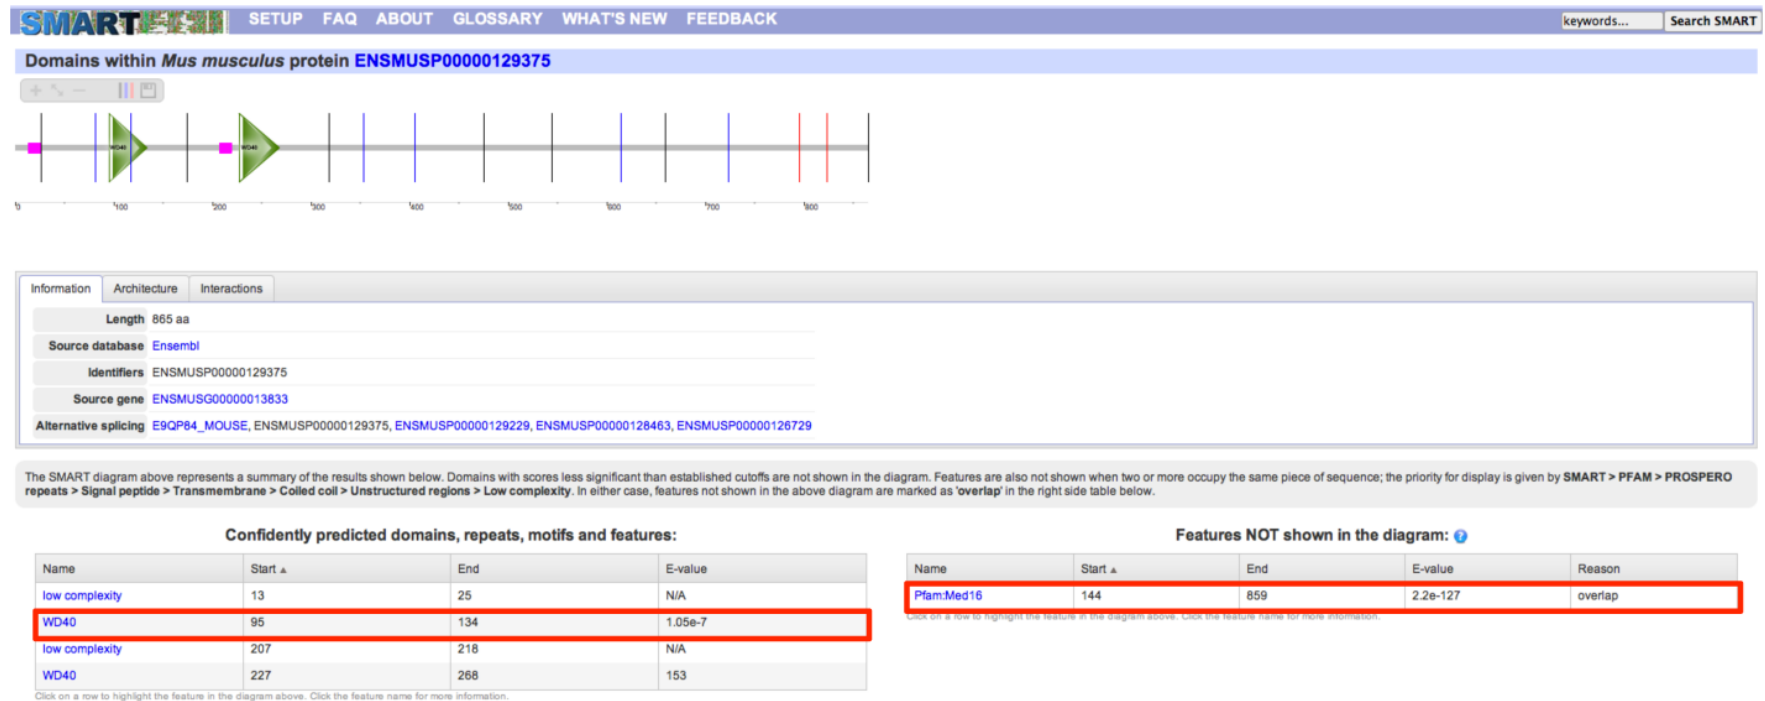

Supplement: MCB.00785-15_zmb999101098so1.pdf [file MCB.00785-15_zmb999101098so1.pdf]
